# Supplementary material for: Trends for isolated amino acids and dipeptides: Conformation, divalent ion binding, and remarkable similarity of binding to calcium and lead
Source: PubMed Central journal article supplement (PMC5093913; doi:10.1038/srep35772), 2016-11-03

# Supporting Information

## Trends for isolated amino acids and dipeptides: Conformation, divalent ion binding, and remarkable similarity of binding to calcium and lead

M. Ropo<sup>1,2,3,\*</sup>, V. Blum<sup>1,4,\*</sup>, and C. Baldauf<sup>1,\*</sup>

<sup>1</sup>Fritz-Haber-Institut der Max-Planck-Gesellschaft, Faradayweg 4-6, D-14195 Berlin, Germany

<sup>2</sup>Department of Physics, Tampere University of Technology, Finland

<sup>3</sup>COMP, Department of Applied Physics, Aalto University, Finland

<sup>4</sup>Department of Mechanical Engineering and Materials Science, Duke University, Durham, NC, USA

\*Corresponding authors: ropo@fhi-berlin.mpg.de, volker.blum@duke.edu, baldauf@fhi-berlin.mpg.de

### Cation-ligand distances

Binding distances between the divalent cations and their nearest ligands in the lowest-energy conformations of 20 cation-coordinated proteinogenic dipeptides. Different ligand atoms are distinguished by different-colored curves (red: O, blue: N, orange: S), as noted in the following figures.

# Dipeptides

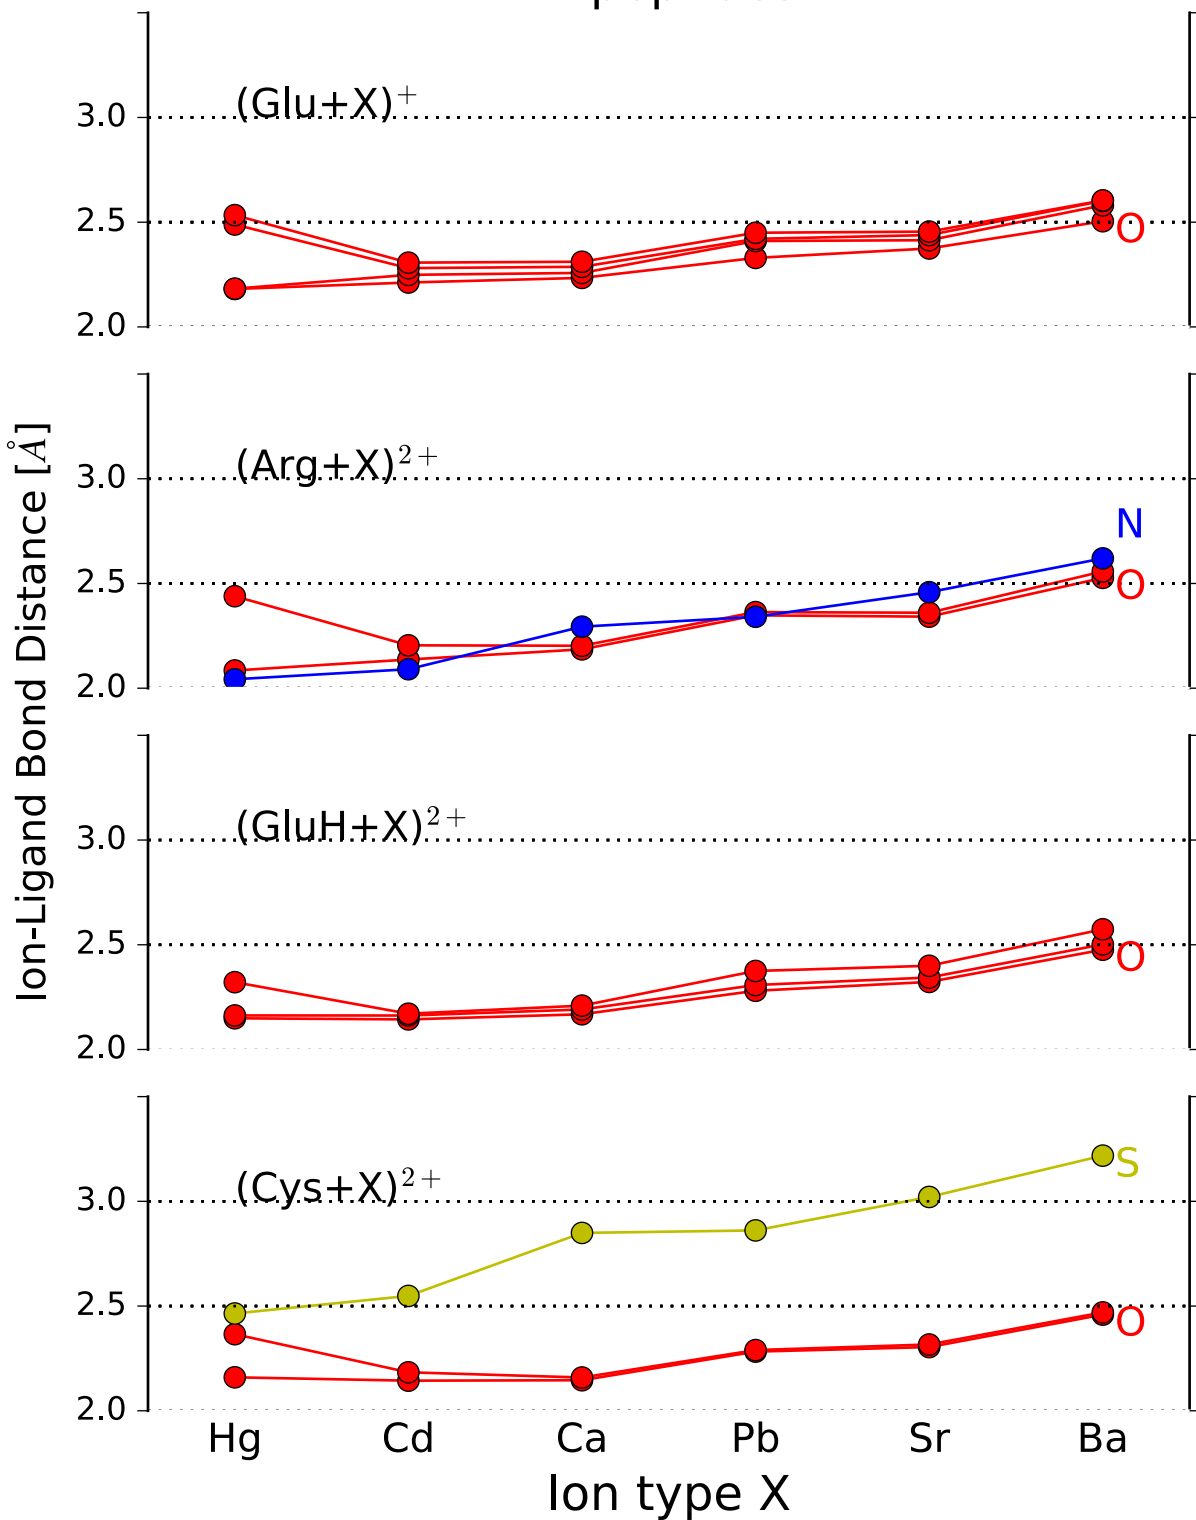

# Dipeptides

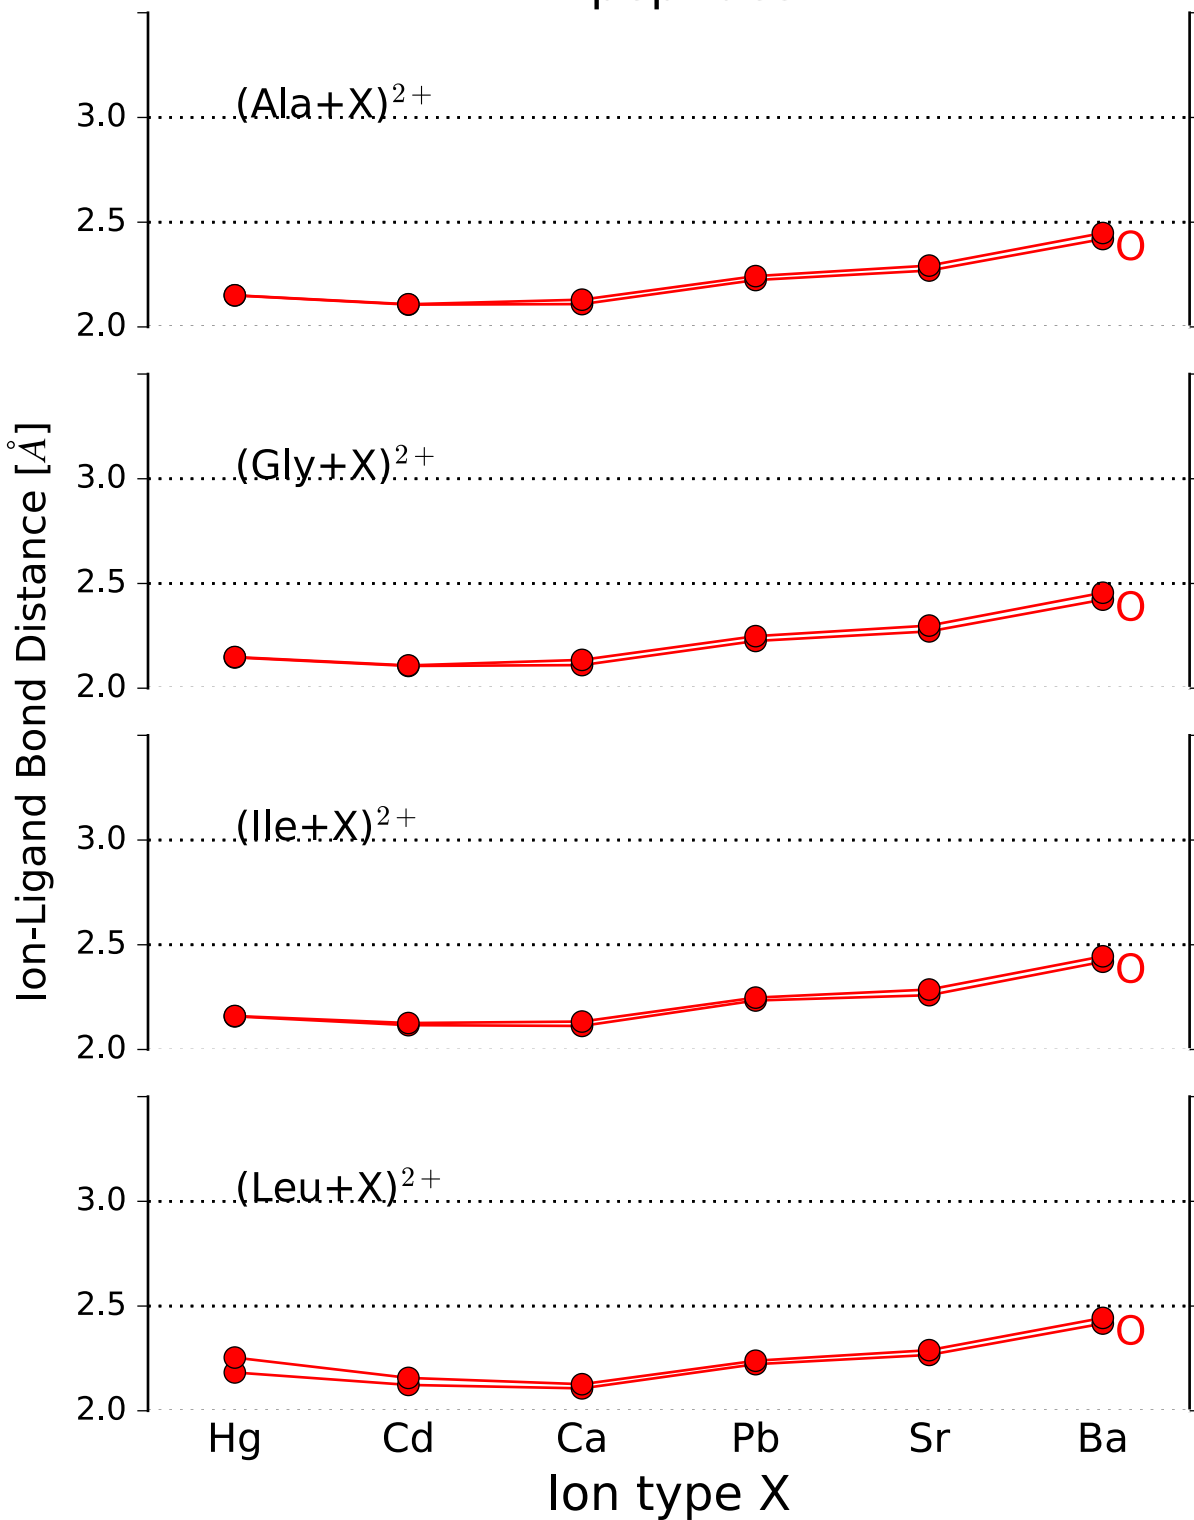

# Dipeptides

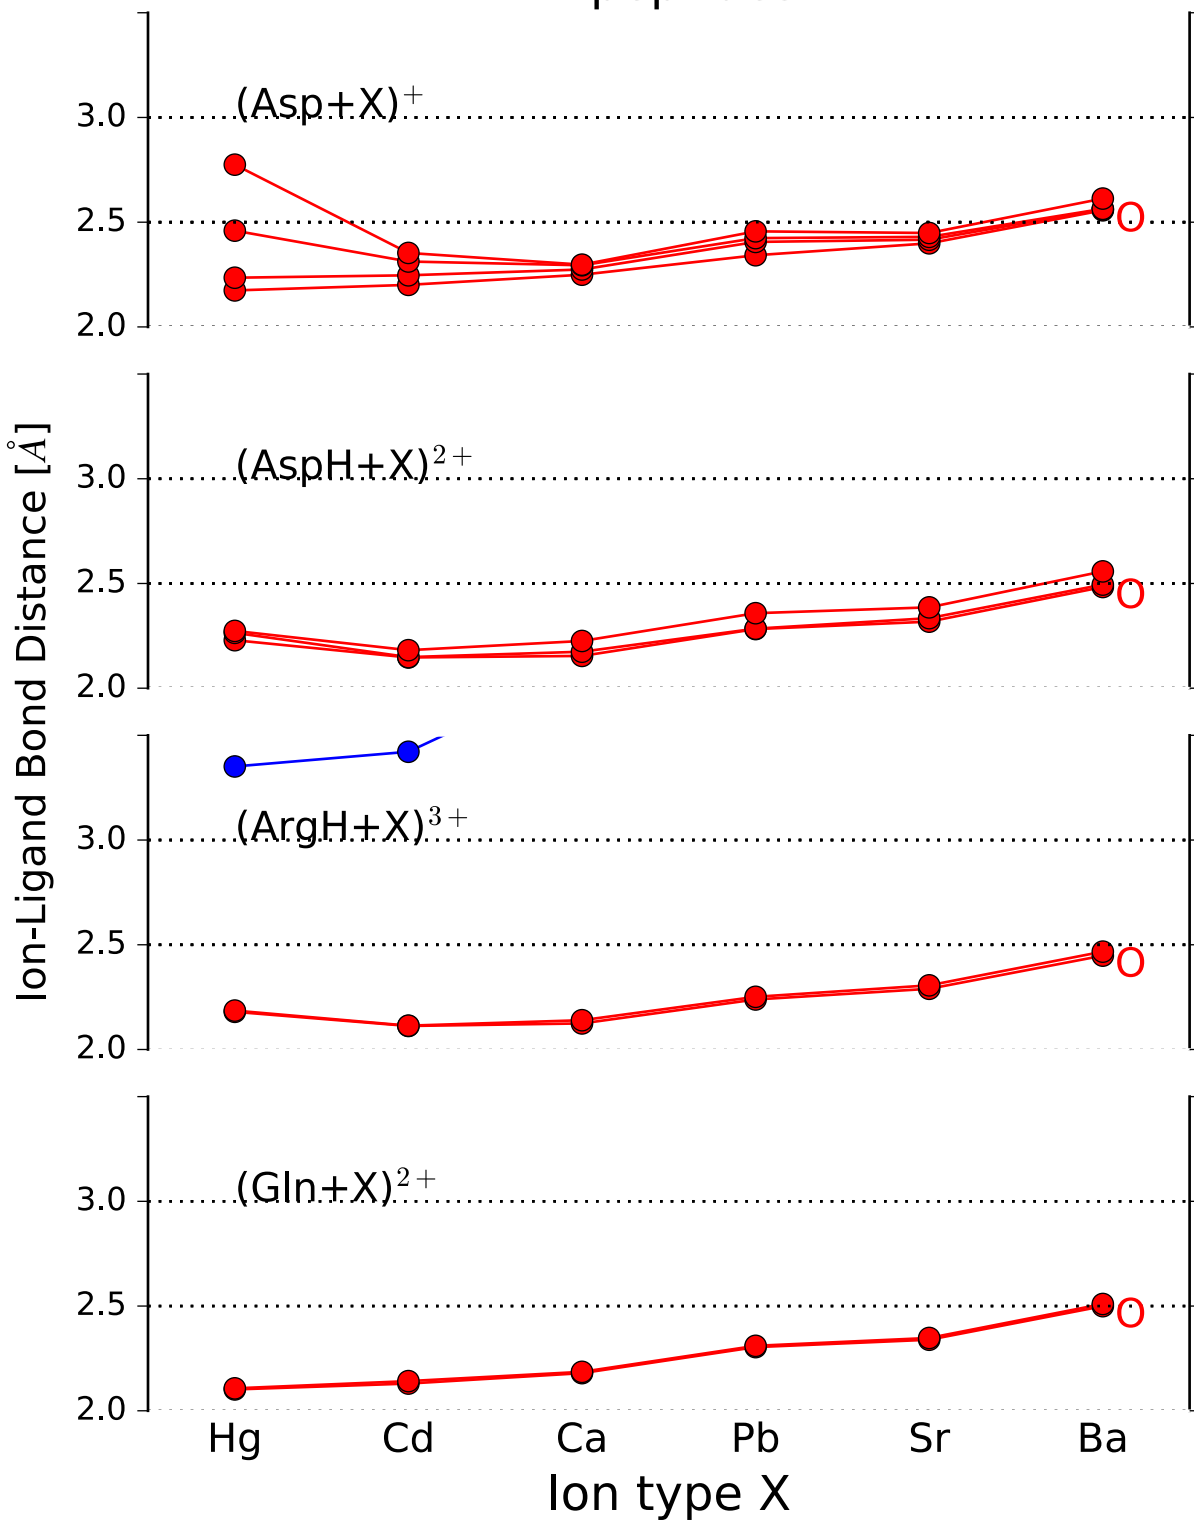

# Dipeptides

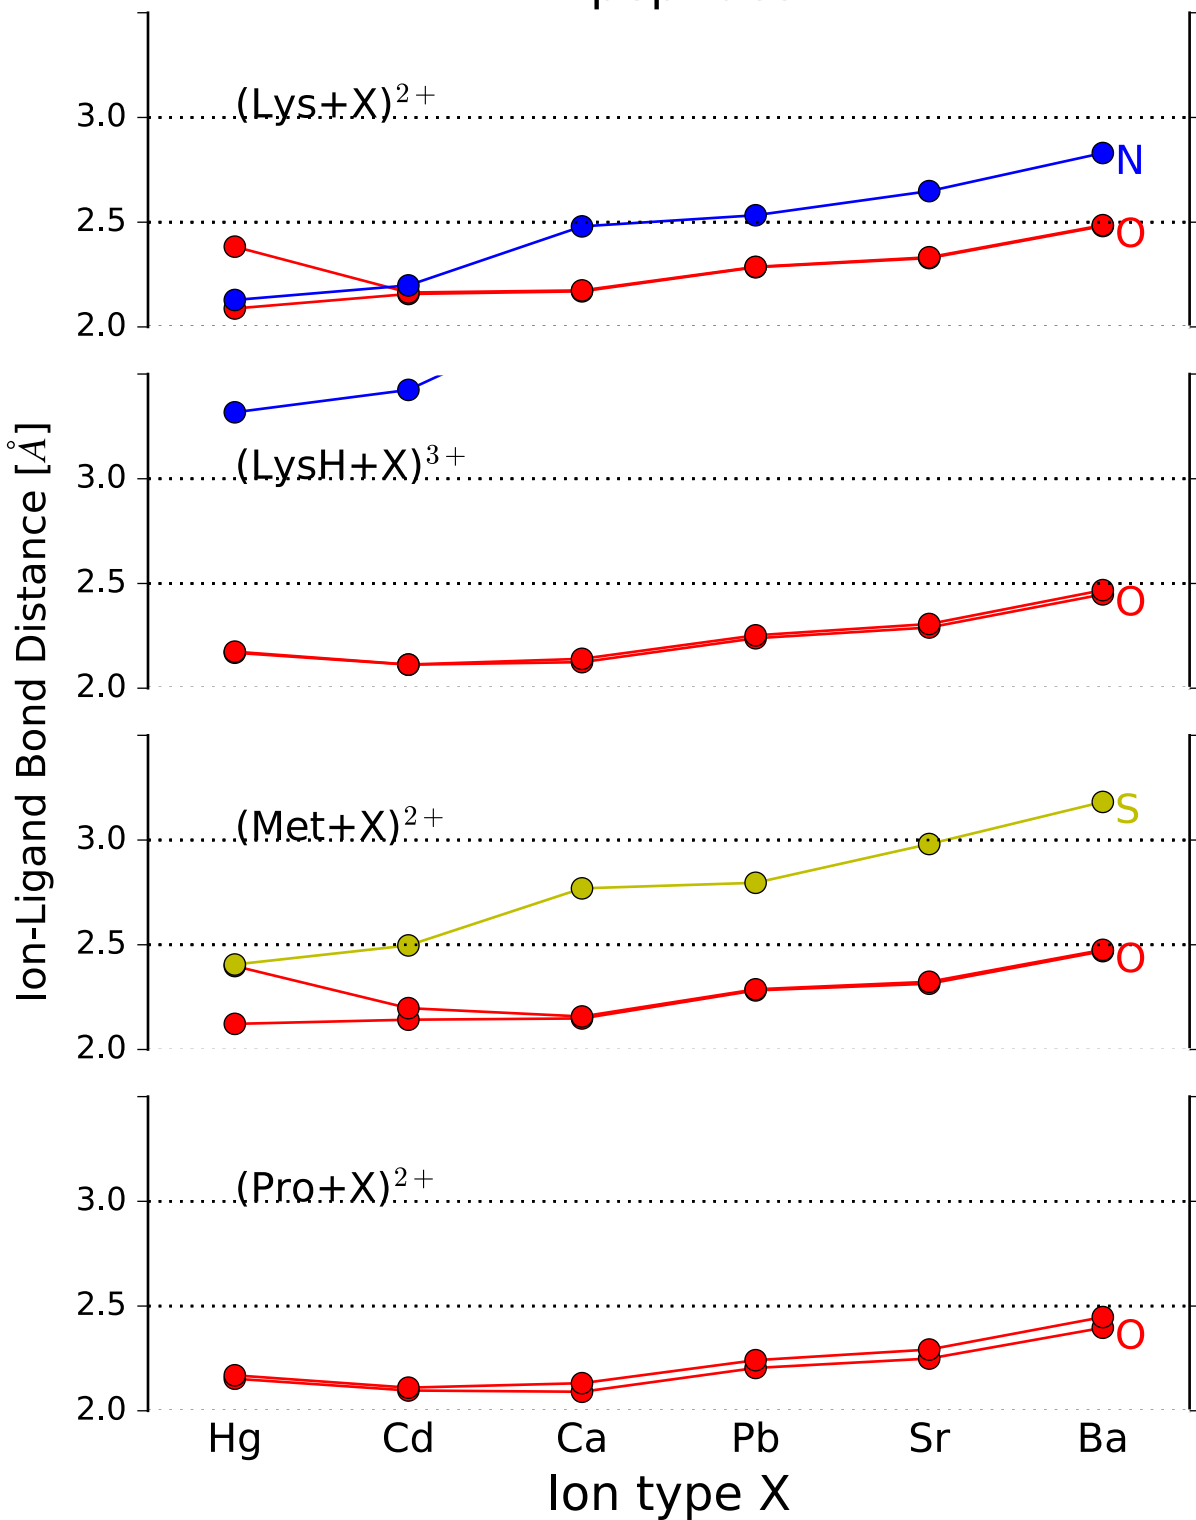

# Dipeptides

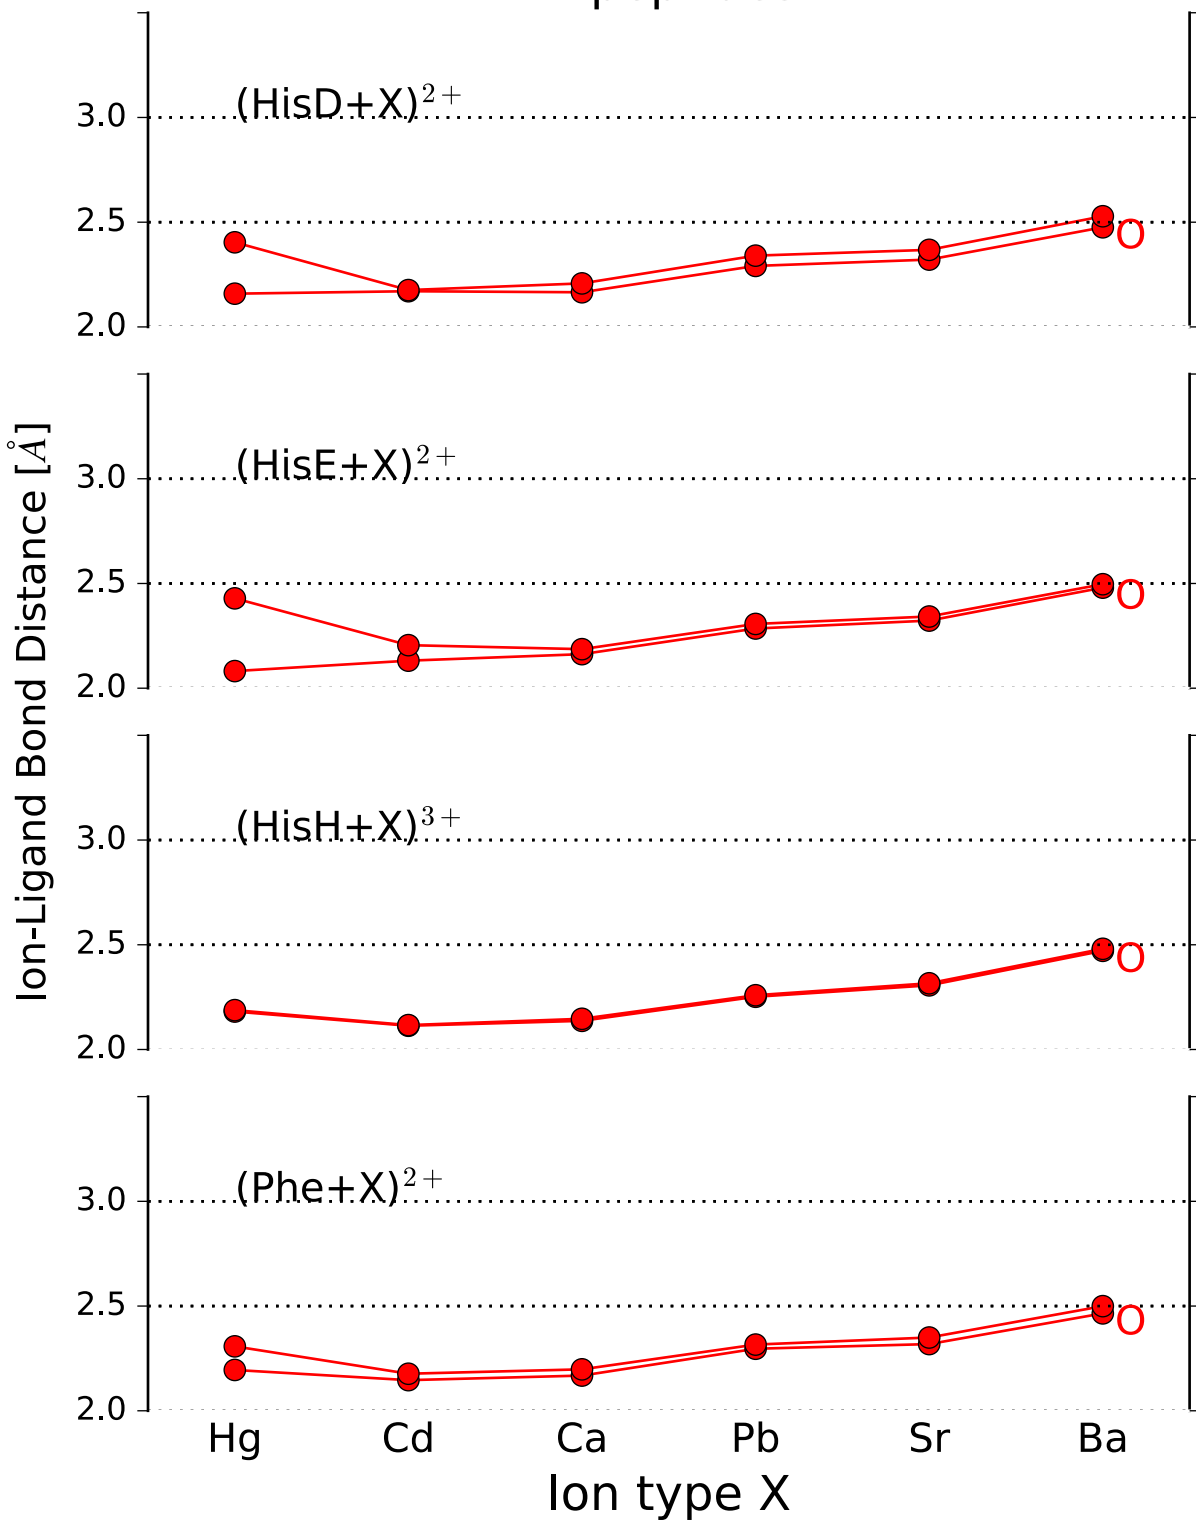

# Dipeptides

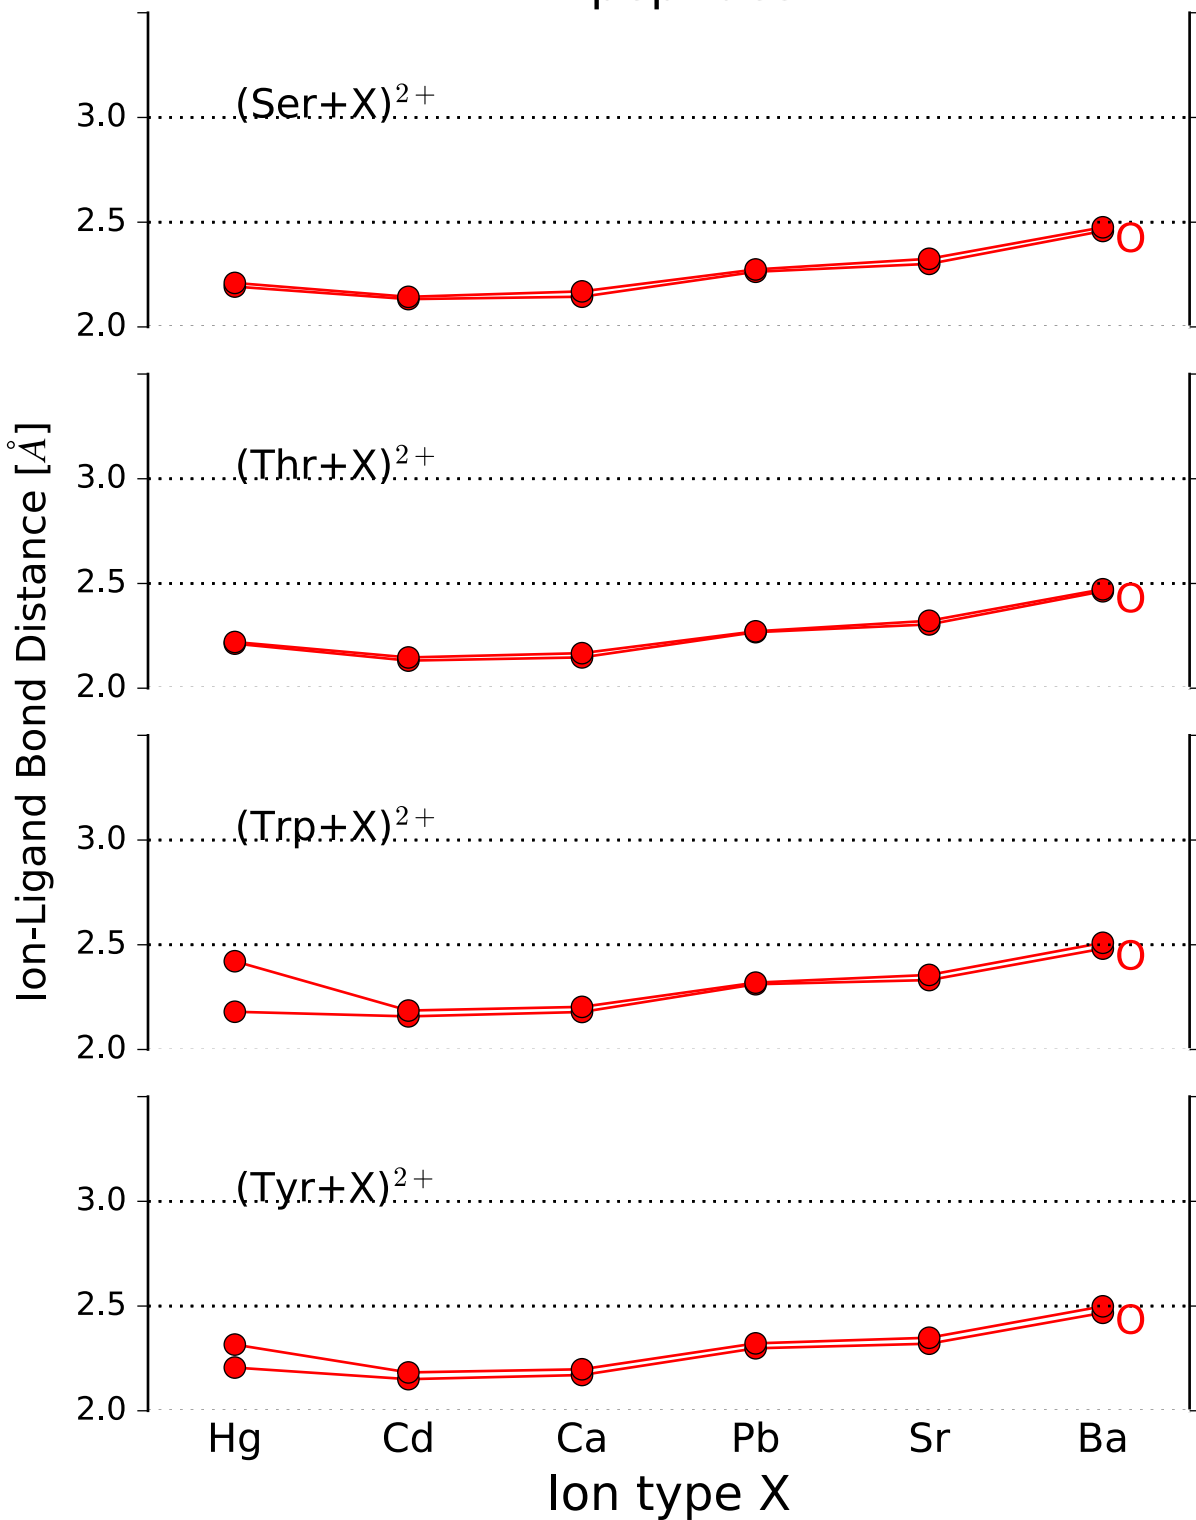

Supplement: srep35772-s1.pdf [file srep35772-s1.pdf]
